# Supplementary material for: Attenuated fusogenicity and pathogenicity of SARS-CoV-2 Omicron variant
Source: Springer Nature journal article supplement (doi:10.1038/s41586-022-04462-1), 2022-02-01
Supplement: 41586_2022_4462_MOESM3_ESM.pdf [file 41586_2022_4462_MOESM3_ESM.pdf]

**Supplementary Table 1. Mutations in Delta and Omicron isolates.**

Mutations detected in a Delta isolate (B.1.617.2 lineage, strain TKYTK1734, GISAID ID: EPI\_ISL\_2378732) compared to an original SARS-CoV-2 (B lineage, strain Wuhan-Hu-1, GenBank accession no. NC\_045512.2)

| Nucleotide position | Reference | Mutation | Mutation type                 | ORF   | Amino acid substitution |
|---------------------|-----------|----------|-------------------------------|-------|-------------------------|
| 210                 | G         | T        | upstream_gene_variant         | NSP1  |                         |
| 241                 | C         | T        | upstream_gene_variant         | NSP1  |                         |
| 1191                | C         | T        | missense_variant              | NSP2  | P129L                   |
| 1267                | C         | T        | synonymous_variant            | NSP2  | G154G                   |
| 3037                | C         | T        | synonymous_variant            | NSP3  | F106F                   |
| 5184                | C         | T        | missense_variant              | NSP3  | P822L                   |
| 9891                | C         | T        | missense_variant              | NSP4  | A446V                   |
| 11418               | T         | C        | missense_variant              | NSP6  | V149A                   |
| 12102               | C         | T        | missense_variant              | NSP8  | S4L                     |
| 12946               | T         | C        | synonymous_variant            | NSP9  | Y87Y                    |
| 14408               | C         | T        | missense_variant              | NSP12 | P303L                   |
| 15451               | G         | A        | missense_variant              | NSP12 | G651S                   |
| 16466               | C         | T        | missense_variant              | NSP13 | P77L                    |
| 18176               | C         | T        | missense_variant              | NSP14 | P46L                    |
| 20148               | C         | T        | synonymous_variant            | NSP15 | F176F                   |
| 20262               | A         | G        | synonymous_variant            | NSP15 | L214L                   |
| 21618               | C         | G        | missense_variant              | S     | T19R                    |
| 21987               | G         | A        | missense_variant              | S     | G142D                   |
| 22028               | GAGTTCA   | G        | disruptive_inframe_deletion   | S     | EFR156-158G             |
| 22917               | T         | G        | missense_variant              | S     | L452R                   |
| 22995               | C         | A        | missense_variant              | S     | T478K                   |
| 23403               | A         | G        | missense_variant              | S     | D614G                   |
| 23604               | C         | G        | missense_variant              | S     | P681R                   |
| 24410               | G         | A        | missense_variant              | S     | D950N                   |
| 25469               | C         | T        | missense_variant              | ORF3a | S26L                    |
| 26767               | T         | C        | missense_variant              | M     | I82T                    |
| 27638               | T         | C        | missense_variant              | ORF7a | V82A                    |
| 27739               | C         | T        | missense_variant              | ORF7a | L116F                   |
| 27752               | C         | T        | missense_variant              | ORF7a | T120I                   |
| 28247               | AGATTTC   | A        | conservative_inframe_deletion | ORF8  | DF119-120del            |
| 28270               | TA        | T        | upstream_gene_variant         | N     |                         |
| 28461               | A         | G        | missense_variant              | N     | D63G                    |
| 28881               | G         | T        | missense_variant              | N     | R203M                   |
| 29402               | G         | T        | missense_variant              | N     | D377Y                   |
| 29742               | G         | T        | downstream_gene_variant       |       |                         |

Mutations detected in an Omicron isolate (BA.1 lineage, strain TY38-873, GISAID ID: EPI\_ISL\_7418017) compared to an original SARS-CoV-2 (B lineage, strain Wuhan-Hu-1, GenBank accession no. NC\_045512.2)

| Nucleotide position | Reference  | Mutation   | Mutation type                | ORF   | Amino acid substitution |
|---------------------|------------|------------|------------------------------|-------|-------------------------|
| 241                 | C          | T          | upstream_gene_variant        | NSP1  |                         |
| 2832                | A          | G          | missense_variant             | NSP3  | K38R                    |
| 3037                | C          | T          | synonymous_variant           | NSP3  | F106F                   |
| 5386                | T          | G          | synonymous_variant           | NSP3  | A889A                   |
| 5673                | C          | T          | missense_variant             | NSP3  | P985L                   |
| 5730                | C          | T          | missense_variant             | NSP3  | T1004I                  |
| 6512                | AGTT       | A          | disruptive_inframe_deletion  | NSP3  | SL1265-1266I            |
| 8393                | G          | A          | missense_variant             | NSP3  | A1892T                  |
| 10029               | C          | T          | missense_variant             | NSP4  | T492I                   |
| 10447               | GCC        | GTA        | missense_variant             | NSP5  | P132Y                   |
| 11282               | AGTTTGCTCG | A          | disruptive_inframe_deletion  | NSP6  | LSG105-107del           |
| 11537               | A          | G          | missense_variant             | NSP6  | I189V                   |
| 13195               | T          | C          | synonymous_variant           | NSP10 | V57V                    |
| 14408               | C          | T          | missense_variant             | NSP12 | P303L                   |
| 15240               | C          | T          | synonymous_variant           | NSP12 | N580N                   |
| 18163               | A          | G          | missense_variant             | NSP14 | I42V                    |
| 21762               | C          | T          | missense_variant             | S     | A67V                    |
| 21764               | ATACATG    | A          | disruptive_inframe_deletion  | S     | HV69-70del              |
| 21846               | C          | T          | missense_variant             | S     | T95I                    |
| 21986               | GGTGTATT   | G          | disruptive_inframe_deletion  | S     | GVYY142-145D            |
| 22193               | AATT       | A          | disruptive_inframe_deletion  | S     | NL211-212I              |
| 22204               | T          | TGAGCCAGAA | disruptive_inframe_insertion | S     | RD214-215EPE            |
| 22578               | G          | A          | missense_variant             | S     | G339D                   |
| 22672               | TTC        | TCT        | missense_variant             | S     | S371L                   |
| 22679               | T          | C          | missense_variant             | S     | S373P                   |
| 22686               | C          | T          | missense_variant             | S     | S375F                   |
| 22813               | G          | T          | missense_variant             | S     | K417N                   |
| 22882               | T          | G          | missense_variant             | S     | N440K                   |
| 22898               | G          | A          | missense_variant             | S     | G446S                   |
| 22992               | G          | A          | missense_variant             | S     | S477N                   |
| 22995               | C          | A          | missense_variant             | S     | T478K                   |
| 23013               | A          | C          | missense_variant             | S     | E484A                   |
| 23040               | A          | G          | missense_variant             | S     | Q493R                   |
| 23048               | G          | A          | missense_variant             | S     | G496S                   |
| 23055               | A          | G          | missense_variant             | S     | Q498R                   |
| 23063               | A          | T          | missense_variant             | S     | N501Y                   |
| 23075               | T          | C          | missense_variant             | S     | Y505H                   |
| 23202               | C          | A          | missense_variant             | S     | T547K                   |
| 23403               | A          | G          | missense_variant             | S     | D614G                   |
| 23525               | C          | T          | missense_variant             | S     | H655Y                   |
| 23599               | T          | G          | missense_variant             | S     | N679K                   |
| 23604               | C          | A          | missense_variant             | S     | P681H                   |
| 23854               | G          | A          | missense_variant             | S     | N764K                   |
| 23948               | C          | T          | missense_variant             | S     | D796Y                   |
| 24130               | C          | A          | missense_variant             | S     | N856K                   |
| 24424               | A          | T          | missense_variant             | S     | Q954H                   |
| 24469               | T          | A          | missense_variant             | S     | N969K                   |
| 24503               | C          | T          | missense_variant             | S     | L981F                   |
| 25000               | C          | T          | synonymous_variant           | S     | D1146D                  |
| 25584               | C          | T          | synonymous_variant           | ORF3a | T64T                    |
| 26270               | C          | T          | missense_variant             | E     | T9I                     |
| 26530               | A          | G          | missense_variant             | M     | D3G                     |
| 26577               | C          | G          | missense_variant             | M     | Q19E                    |
| 26709               | G          | A          | missense_variant             | M     | A63T                    |
| 27259               | A          | C          | synonymous_variant           | ORF6  | R20R                    |
| 27807               | C          | T          | synonymous_variant           | ORF7b | L18L                    |
| 28271               | A          | T          | upstream_gene_variant        | N     |                         |
| 28311               | C          | T          | missense_variant             | N     | P13L                    |
| 28361               | GGAGAACGCA | G          | disruptive_inframe_deletion  | N     | ERS31-33del             |
| 28880               | AGGG       | AAAC       | missense_variant             | N     | RG203-204KR             |
| 29645               | G          | T          | missense_variant             | ORF10 | V30L                    |
